# Supplementary material
Source: PubMed Central journal article supplement (PMC9336002)

## **Table of Contents**

**Table S1.** The RMSE in different models.

**Table S2.** World population age standard

**Table S3.** The age-standardized rate of breast cancer case in the world, East Asia and Pacific, China, Japan and South Korea from 1990 to 2019

**Table S4.** EAPC of percent of DALYs and deaths for breast cancer attributable to risk factors in China, Japan and South Korea, 1990-2019

**Table S5.** Predicted number of breast cancer incident cases and deaths in China, Japan and South Korea, and changes between 2020 and 2034 stratified into changes due to risk and demographics by sex.

**Table S6.** Number of population estimates (in millions) in 1990 and 2019 and population projections in 2020 and 2034 by country.

**Table S7.** The death rates of breast cancer in China, Japan and South Korea by sex and age, during 1990-2019, and projected until 2034.

**Fig S1.** The number of breast cancer incident cases (A), deaths (B) and disability-adjusted life years (DALYs) (C) by sex and location from 1990 to 2019

**Fig S2.** The ASIR(A), ASDR(B), and ASR of DALYs(C) of breast cancer in China, Japan, South Korea, East Asia and Pacific and the world from 1990 to 2019. ASIR: age-standardized incidence rate, ASDR: age-standardized death rate, ASR: age-standardized rate, DALYs: disability-adjusted life-years

**Fig S3.** The number of breast cancer incident case, deaths and disability-adjusted life years (DALYs) for both sexes by age group in China, Japan, South Korea, East Asia and the Pacific and the world in 2019. The error bar indicates 95% uncertainty interval of the number

**Fig S4.** The rates of breast cancer incidence, death and disability-adjusted life years (DALYs) for both sexes by age group in China, Japan, South Korea, East Asia and the Pacific and the world in 2019. The error bar indicates 95% uncertainty interval of the rates

**Fig S5.** The EAPCs of ASIR, ASDR and ASR of DALYs for breast cancer from 1990 to 2019 by

sex in the China, Japan, South Korea, East Asia and the Pacific and the world. EAPC: estimated annual percentage change; ASIR: age-standardized incidence rate; ASDR: age-standardized death rate; ASR: age-standardized rate; DALYs: disability-adjusted life-years. The error bar indicates 95% confidence interval (CI) of the EAPCs

**Fig S6.** Temporal trends of percent of deaths for breast cancer attributable to risk factors in China (A), Japan (B) and South Korea (C), 1990-2019.

**Fig S7.** Temporal trends of percent of DALYs for breast cancer attributable to risk factors in China (A), Japan (B) and South Korea (C), 1990-2019. DALYs: disability-adjusted life-years

**Fig S8.** Trends in ASIR and ASDR during 1990–2019 and predictions from 2020 to 2034 in China (A-B), Japan (C-D) and South Korea (E-F). ASIR: age-standardized incidence rate; ASDR: age-standardized death rate

**Fig S9.** The number of incident cases and deaths during 1990-2019 and projected from 2020 to 2034 in Japan. (A-B) Both sexes; (C-D) Female; (E-F) Male. The error bar indicates 95% confidence interval (CI) of the number

**Fig S10.** The number of incident cases and deaths during 1990-2019 and projected from 2020 to 2034 in South Korea. (A-B) Both sexes; (C-D) Female; (E-F) Male. The error bar indicates 95% confidence interval (CI) of the number

**Table S1.** The RMSE in different models.

| Models    | incidence      |                |                | death          |                |                |
|-----------|----------------|----------------|----------------|----------------|----------------|----------------|
|           | China          | Japan          | South Korea    | China          | Japan          | South Korea    |
| BAPC      | 48.8063        | 16.0654        | 1.4269         | <b>1.7219*</b> | 1.5266         | 0.1873         |
| ER        | 19.3235        | 12.4473        | 4.2027         | 5.7156         | 1.0471         | 0.3427         |
| BAMP(RW1) | 25.2149        | <b>1.8185*</b> | <b>0.7931*</b> | 2.0723         | <b>0.5573*</b> | <b>0.0487*</b> |
| BAMP(RW2) | <b>7.6281*</b> | 15.3948        | 1.0358         | 2.7782         | 1.823          | 0.1797         |
| CR        | 61.2986        | 38.3248        | 2.6009         | 10.3053        | 1.0458         | 0.4293         |

\* denotes the lowest RMSE.

RMSE, root-mean-squared-error, reflects the average deviation of estimates from the observed counts during the validation period

**Table S2.** World population age standard

| Age group | Percent of Population |
|-----------|-----------------------|
| 0-4       | 9.94                  |
| 5-9       | 9.57                  |
| 10-14     | 8.99                  |
| 15-19     | 8.32                  |
| 20-24     | 7.87                  |
| 25-29     | 7.63                  |
| 30-34     | 7.33                  |
| 35-39     | 6.81                  |
| 40-44     | 6.14                  |
| 45-49     | 5.51                  |
| 50-54     | 4.92                  |
| 55-59     | 4.35                  |
| 60-64     | 3.68                  |
| 65-69     | 2.99                  |
| 70-74     | 2.27                  |
| 75-79     | 1.61                  |
| 80-84     | 1.11                  |
| 85+       | 0.96                  |

**Table S3.** The age-standardized rate of breast cancer case in the world, East Asia and Pacific, China, Japan and South Korea from 1990 to 2019

| Variables             | ASIR(/10 <sup>5</sup> )/(95%UI) |                    | EAPC (95%CI)        | ASDR(/10 <sup>5</sup> )/(95%UI) |                    | EAPC (95%CI)         | ASR of DALYs (/10 <sup>5</sup> ) (95%CI) |                       | EAPC (95%CI)                 |
|-----------------------|---------------------------------|--------------------|---------------------|---------------------------------|--------------------|----------------------|------------------------------------------|-----------------------|------------------------------|
|                       | 1990                            | 2019               | ASIR<br>(1990-2019) | 1990                            | 2019               | ASDR (1990-2019)     | 1990                                     | 2019                  | ASR of DALYRs<br>(1990-2019) |
| World                 |                                 |                    |                     |                                 |                    |                      |                                          |                       |                              |
| Both                  | 21.44(20.65-22.1)               | 24.17(22.11-26.24) | 0.32(0.27-0.38) *   | 9.8(9.3-10.21)                  | 8.62(7.95-9.25)    | -0.56(-0.61--0.51) * | 275.32(263.24-288.77)                    | 247.63(228.68-266.08) | -0.51(-0.56--0.45) *         |
| Female                | 40.12(38.78-41.33)              | 45.86(41.91-49.76) | 0.36(0.31-0.42) *   | 17.76(16.93-18.51)              | 15.88(14.66-17.07) | -0.51(-0.57--0.46) * | 524.87(501.78-551.15)                    | 473.83(437.3-510.51)  | -0.51(-0.57--0.45) *         |
| Male                  | 0.53(0.5-0.57)                  | 0.65(0.58-0.72)    | 0.9(0.75-1.06) *    | 0.37(0.34-0.40)                 | 0.33(0.29-0.36)    | -0.23(-0.37--0.09)   | 8.18(7.54-8.82)                          | 7.96(7.03-8.8)        | 0.14(-0.01-0.29)             |
| East Asia and Pacific |                                 |                    |                     |                                 |                    |                      |                                          |                       |                              |
| Both                  | 11.73(10.69-12.84)              | 20.5(17.64-23.7)   | 2.03(1.95-2.12) *   | 6.06(5.5-6.67)                  | 6.24(5.52-7.02)    | 0.08(0.05-0.11)      | 190.18(171.85-210.91)                    | 193.3(171.67-217.67)  | -0.01(-0.05-0.04)            |
| Female                | 22.83(20.74-25.05)              | 39.61(34-45.99)    | 1.98(1.9-2.06) *    | 11.49(10.42-12.64)              | 11.67(10.32-13.2)  | 0(-0.04-0.05)        | 375.26(338.26-417.02)                    | 374.63(331.57-423.38) | -0.1(-0.16--0.04)            |
| Male                  | 0.21(0.19-0.24)                 | 0.59(0.48-0.71)    | 4.99(4.31-5.68) *   | 0.17(0.14-0.19)                 | 0.26(0.22-0.31)    | 2.78(2.22-3.33) *    | 3.66(3.19-4.15)                          | 6.89(5.68-8.25)       | 3.62(2.98-4.26) *            |
| China                 |                                 |                    |                     |                                 |                    |                      |                                          |                       |                              |
| Both                  | 8.54(7.07-10.11)                | 18.32(14.5-22.93)  | 2.8(2.7-2.91) *     | 4.74(3.96-5.57)                 | 4.85(3.91-5.92)    | 0.06(0-0.12)         | 145.67(121.08-172.57)                    | 144.15(117.26-174.99) | -0.13(-0.19--0.06) *         |
| Female                | 17.07(14.02-20.3)               | 35.61(28.07-44.81) | 2.66(2.57-2.76) *   | 9.16(7.61-10.82)                | 9.02(7.19-11.1)    | -0.14(-0.21--0.06) * | 294.04(243.51-349.12)                    | 277.98(224.35-339.93) | -0.35(-0.43--0.26) *         |
| Male                  | 0.13(0.1-0.15)                  | 0.69(0.53-0.88)    | 8.37(7.32-9.43) *   | 0.1(0.08-0.12)                  | 0.29(0.22-0.36)    | 6.03(5.08-6.97) *    | 2.45(2-2.93)                             | 7.73(5.98-9.62)       | 6.38(5.37-7.39) *            |
| Japan                 |                                 |                    |                     |                                 |                    |                      |                                          |                       |                              |
| Both                  | 19.07(17.92-20.29)              | 31.02(24.85-38.16) | 1.94(1.71-2.18) *   | 4.82(4.59-4.95)                 | 5.37(4.85-5.72)    | 0.55(0.41-0.7) *     | 157.67(151.39-164.52)                    | 172.96(160.51-187.61) | 0.42(0.24-0.6) *             |
| Female                | 36.07(33.92-38.39)              | 60.47(48.35-74.56) | 2.03(1.8-2.27) *    | 8.8(8.42-9.03)                  | 10.14(9.24-10.78)  | 0.66(0.5-0.81) *     | 300.26(288.72-313.02)                    | 338.09(314.53-366.48) | 0.5(0.31-0.68) *             |
| Male                  | 0.19(0.17-0.22)                 | 0.24(0.19-0.31)    | 0.65(0.36-0.93) *   | 0.09(0.08-0.09)                 | 0.08(0.07-0.09)    | -0.7(-0.96--0.44) *  | 2.06(1.98-2.15)                          | 1.91(1.77-2.07)       | -0.59(-0.84--0.34)           |
| South Korea           |                                 |                    |                     |                                 |                    |                      |                                          |                       |                              |
| Both                  | 9.5(8.9-10.19)                  | 23.79(19.29-28.65) | 3.42(3.07-3.78) *   | 4.32(4.09-4.58)                 | 4.69(4.12-5.24)    | 0.46(0.31-0.6) *     | 136.52(129.1-144.82)                     | 143.56(126.99-161.59) | 0.39(0.26-0.52) *            |
| Female                | 17.5(16.39-18.81)               | 46.4(37.59-56.14)  | 3.6(3.27-3.94) *    | 7.62(7.21-8.08)                 | 8.73(7.71-9.73)    | 0.64(0.52-0.76) *    | 255.11(241.07-270.67)                    | 281.19(247.83-316.56) | 0.53(0.42-0.64) *            |
| Male                  | 0.13(0.11-0.15)                 | 0.21(0.15-0.28)    | 0.52(-0.04-1.09)    | 0.09(0.08-0.11)                 | 0.08(0.06-0.1)     | -1.89(-2.53--1.26) * | 2.03(1.75-2.4)                           | 1.77(1.4-2.2)         | -1.61(-2.13--1.09)           |

ASIR: age-standardized incidence rate, ASDR: age-standardized death rate, ASR: age-standardized rate, DALYs: disability-adjusted life-years, EAPC: estimated annual percentage change

\* Changes that are statistically significant.

**Table S4.** EAPC of percent of DALYs and deaths for breast cancer attributable to risk factors in

China, Japan and South Korea, 1990-2019

| Country     | Sex    | Risk factors                | Measure       | EAPC (95%CI)         |
|-------------|--------|-----------------------------|---------------|----------------------|
| China       | Female | Alcohol use                 | DALYs_percent | 0.5(0.25-0.75) *     |
| China       | Female | Diet high in red meat       | DALYs_percent | 1.65(1.58-1.72) *    |
| China       | Female | High body-mass index        | DALYs_percent | 3.22(3.03-3.41) *    |
| China       | Female | High fasting plasma glucose | DALYs_percent | 0.85(0.62-1.08) *    |
| China       | Female | Low physical activity       | DALYs_percent | -0.14(-0.33-0.04)    |
| China       | Female | Tobacco                     | DALYs_percent | -0.24(-0.28--0.19) * |
| China       | Male   | Alcohol use                 | DALYs_percent | 0.46(0.33-0.6) *     |
| China       | Male   | Diet high in red meat       | DALYs_percent | 1.9(1.79-2.01) *     |
| China       | Male   | Tobacco                     | DALYs_percent | -0.19(-0.22--0.16) * |
| Japan       | Female | Alcohol use                 | DALYs_percent | -0.49(-0.55--0.42) * |
| Japan       | Female | Diet high in red meat       | DALYs_percent | -0.15(-0.24--0.05)   |
| Japan       | Female | High body-mass index        | DALYs_percent | 4.23(3.92-4.54) *    |
| Japan       | Female | High fasting plasma glucose | DALYs_percent | 0.32(0.09-0.55) *    |
| Japan       | Female | Low physical activity       | DALYs_percent | 0.43(0.36-0.49) *    |
| Japan       | Female | Tobacco                     | DALYs_percent | -0.36(-0.41--0.31) * |
| Japan       | Male   | Alcohol use                 | DALYs_percent | -0.3(-0.35--0.26) *  |
| Japan       | Male   | Diet high in red meat       | DALYs_percent | -0.09(-0.18-0.01) *  |
| Japan       | Male   | Tobacco                     | DALYs_percent | -0.39(-0.45--0.34) * |
| South Korea | Female | Alcohol use                 | DALYs_percent | 0.06(-0.01-0.13)     |
| South Korea | Female | Diet high in red meat       | DALYs_percent | 1.82(1.4-2.23) *     |
| South Korea | Female | High body-mass index        | DALYs_percent | 4.28(3.75-4.81) *    |
| South Korea | Female | High fasting plasma glucose | DALYs_percent | 1.09(0.94-1.25) *    |
| South Korea | Female | Low physical activity       | DALYs_percent | 0.5(0.47-0.54) *     |
| South Korea | Female | Tobacco                     | DALYs_percent | -1.42(-1.48--1.35) * |
| South Korea | Male   | Alcohol use                 | DALYs_percent | 0.12(0.07-0.17)      |
| South Korea | Male   | Diet high in red meat       | DALYs_percent | 1.81(1.44-2.18) *    |
| South Korea | Male   | Tobacco                     | DALYs_percent | -0.35(-0.37--0.33) * |
| China       | Female | Alcohol use                 | Death_percent | 0.35(0.18-0.52) *    |
| China       | Female | Diet high in red meat       | Death_percent | 1.6(1.53-1.67) *     |
| China       | Female | High body-mass index        | Death_percent | 2.99(2.86-3.12) *    |
| China       | Female | High fasting plasma glucose | Death_percent | 0.72(0.5-0.95) *     |
| China       | Female | Low physical activity       | Death_percent | -0.25(-0.41--0.09) * |
| China       | Female | Tobacco                     | Death_percent | -0.26(-0.33--0.19) * |
| China       | Male   | Alcohol use                 | Death_percent | 0.46(0.32-0.61) *    |
| China       | Male   | Diet high in red meat       | Death_percent | 1.77(1.67-1.87) *    |
| China       | Male   | Tobacco                     | Death_percent | -0.37(-0.42--0.32) * |
| Japan       | Female | Alcohol use                 | Death_percent | -0.54(-0.62--0.46) * |
| Japan       | Female | Diet high in red meat       | Death_percent | -0.16(-0.25--0.06) * |
| Japan       | Female | High body-mass index        | Death_percent | 1.64(1.52-1.75) *    |
| Japan       | Female | High fasting plasma glucose | Death_percent | 0.15(-0.09-0.39) *   |

|             |        |                             |               |                      |
|-------------|--------|-----------------------------|---------------|----------------------|
| Japan       | Female | Low physical activity       | Death_percent | 0.41(0.32-0.49) *    |
| Japan       | Female | Tobacco                     | Death_percent | -0.55(-0.6--0.51) *  |
| Japan       | Male   | Alcohol use                 | Death_percent | -0.34(-0.39--0.29) * |
| Japan       | Male   | Diet high in red meat       | Death_percent | -0.08(-0.17-0) *     |
| Japan       | Male   | Tobacco                     | Death_percent | -0.39(-0.45--0.34) * |
| South Korea | Female | Alcohol use                 | Death_percent | 0.04(-0.04-0.12)     |
| South Korea | Female | Diet high in red meat       | Death_percent | 1.66(1.26-2.07) *    |
| South Korea | Female | High body-mass index        | Death_percent | 2.04(1.86-2.22) *    |
| South Korea | Female | High fasting plasma glucose | Death_percent | 1.06(0.89-1.22) *    |
| South Korea | Female | Low physical activity       | Death_percent | 0.53(0.49-0.58) *    |
| South Korea | Female | Tobacco                     | Death_percent | -1.49(-1.55--1.43) * |
| South Korea | Male   | Alcohol use                 | Death_percent | 0.19(0.12-0.25)      |
| South Korea | Male   | Diet high in red meat       | Death_percent | 1.69(1.35-2.03) *    |
| South Korea | Male   | Tobacco                     | Death_percent | -0.27(-0.3--0.24) *  |

---

DALYs: disability-adjusted life years

\* Changes that are statistically significant.



**Table S5.** Predicted number of breast cancer incident cases and deaths in China, Japan and South Korea, and changes between 2020 and 2034 stratified into changes due to risk and demographics by sex.

| Country            | Number of incident cases or deaths |         |         |         | Changes between 2020 and 2034 (%) |                    |                             |                          |
|--------------------|------------------------------------|---------|---------|---------|-----------------------------------|--------------------|-----------------------------|--------------------------|
|                    | 2020                               | 2025    | 2030    | 2034    | Total change                      | Change due to risk | Change due to age structure | Change due to population |
| <b>China</b>       |                                    |         |         |         |                                   |                    |                             |                          |
| incidence          |                                    |         |         |         |                                   |                    |                             |                          |
| female             | 361,917                            | 393,089 | 419,673 | 434,744 | 20.5                              | 0.7                | 17.39                       | 2.41                     |
| male               | 7,621                              | 9,583   | 11,497  | 13,105  | 72.52                             | 32.56              | 38.59                       | 1.37                     |
| death              |                                    |         |         |         |                                   |                    |                             |                          |
| female             | 89,648                             | 98,531  | 105,954 | 110,777 | 23.09                             | -11.62             | 32.27                       | 2.44                     |
| male               | 2,887                              | 3,674   | 4,415   | 5,055   | 73.82                             | 27.63              | 44.81                       | 1.38                     |
| <b>Japan</b>       |                                    |         |         |         |                                   |                    |                             |                          |
| incidence          |                                    |         |         |         |                                   |                    |                             |                          |
| female             | 73,786                             | 74,806  | 74,602  | 73,555  | -0.33                             | 0.36               | 6.03                        | -6.72                    |
| male               | 329                                | 343     | 354     | 362     | 10.21                             | 0.11               | 17.81                       | -7.71                    |
| death              |                                    |         |         |         |                                   |                    |                             |                          |
| female             | 15,951                             | 16,760  | 17,393  | 17,585  | 10.51                             | 0.93               | 16.65                       | -7.07                    |
| male               | 120                                | 128     | 134     | 139     | 15.13                             | -5.97              | 29.01                       | -7.91                    |
| <b>South Korea</b> |                                    |         |         |         |                                   |                    |                             |                          |
| incidence          |                                    |         |         |         |                                   |                    |                             |                          |
| female             | 20,046                             | 21,689  | 23,001  | 23,622  | 17.57                             | -2.28              | 20.43                       | -0.58                    |
| male               | 68                                 | 81      | 94      | 103     | 55.56                             | 0.35               | 56.82                       | -1.61                    |
| death              |                                    |         |         |         |                                   |                    |                             |                          |
| female             | 4,076                              | 4,539   | 4,927   | 5,181   | 27.17                             | -6.79              | 34.57                       | -0.61                    |
| male               | 21                                 | 27      | 32      | 36      | 75                                | 1.22               | 75.52                       | -1.74                    |

**Table S6.** Number of population estimates (in millions) in 1990 and 2019 and population projections in 2020 and 2034 by country.

| Variable | Value  | China   |        |        |        | Japan  |        |        |        | South Korea |        |        |        |        |
|----------|--------|---------|--------|--------|--------|--------|--------|--------|--------|-------------|--------|--------|--------|--------|
|          |        | 1990    | 2019   | 2020   | 2034   | 1990   | 2019   | 2020   | 2034   | 1990        | 2019   | 2020   | 2034   |        |
| Female   | Number | 573.5   | 697.53 | 701.08 | 716.59 | 63.99  | 65.52  | 64.72  | 60.51  | 22.07       | 26.42  | 25.6   | 25.47  |        |
|          | 15-49  | Number  | 323.02 | 351.1  | 342.28 | 306.07 | 32.13  | 25.41  | 24.84  | 20.17       | 12.64  | 12.37  | 11.74  | 9.25   |
|          |        | Percent | 56.33% | 50.33% | 48.82% | 42.71% | 50.20% | 38.79% | 38.37% | 33.33%      | 57.30% | 46.83% | 45.85% | 36.34% |
|          | 50-69  | Number  | 74.26  | 184.39 | 186.1  | 204.8  | 14.58  | 16.58  | 16.26  | 16.88       | 3.1    | 7.62   | 7.54   | 7.92   |
|          |        | Percent | 12.95% | 26.43% | 26.54% | 28.58% | 22.78% | 25.31% | 25.12% | 27.90%      | 14.03% | 28.84% | 29.43% | 31.11% |
|          | >70    | Number  | 21.75  | 58.72  | 53.89  | 101.28 | 6.05   | 15.92  | 15.97  | 17.16       | 0.83   | 3.1    | 3.21   | 5.76   |
|          |        | Percent | 3.79%  | 8.42%  | 7.69%  | 14.13% | 9.45%  | 24.30% | 24.67% | 28.36%      | 3.77%  | 11.74% | 12.53% | 22.63% |
| Male     | Number | 610.19  | 724.82 | 738.25 | 745.88 | 61.88  | 62.27  | 61.75  | 57.4   | 22.27       | 26.98  | 25.67  | 25.34  |        |
|          | 15-49  | Number  | 345.44 | 369.63 | 370.15 | 342.17 | 32.83  | 26.34  | 25.94  | 21.13       | 13.24  | 13.68  | 12.75  | 10.2   |
|          |        | Percent | 56.61% | 51%    | 50.14% | 45.87% | 53.06% | 42.30% | 42.01% | 36.82%      | 59.44% | 50.69% | 49.69% | 40.25% |
|          | 50-69  | Number  | 79.79  | 184.5  | 187.75 | 206.74 | 13.38  | 16.28  | 16.16  | 16.93       | 2.65   | 7.62   | 7.39   | 7.97   |
|          |        | Percent | 13.08% | 25.45% | 25.43% | 27.72% | 21.62% | 26.14% | 26.17% | 29.50%      | 11.92% | 28.25% | 28.81% | 31.44% |
|          | >70    | Number  | 16.51  | 49.24  | 44.22  | 83     | 3.84   | 11.65  | 11.57  | 12.69       | 0.44   | 2.15   | 2.21   | 4.5    |
|          |        | Percent | 2.71%  | 6.79%  | 5.99%  | 11.13% | 6.20%  | 18.70% | 18.73% | 22.10%      | 1.97%  | 7.97%  | 8.61%  | 17.76% |

**Table S7.** The death rates of breast cancer in China, Japan and South Korea by sex and age, during 1990-2019, and projected until 2034.

|                            | Death Rate (/10 <sup>5</sup> ) |                    |                     |                     | EAPC                 |                         |
|----------------------------|--------------------------------|--------------------|---------------------|---------------------|----------------------|-------------------------|
|                            | 1990 (95% UI)                  | 2019 (95% UI)      | 2020 (95% CI)       | 2034 (95% CI)       | 1990-2019 (95% CI)   | 2020-2034 (95% CI)      |
| <b>China</b>               |                                |                    |                     |                     |                      |                         |
| <b>Both</b> <sup>a</sup>   | 4.74(3.96-5.57)                | 4.85(3.91-5.92)    | 4.76(4.06-5.57)     | 4.41(3.6-5.43)      | 0.06(0-0.12) *       | -0.55(-0.58--0.52) *    |
| <b>Female</b> <sup>a</sup> | 9.16(7.61-10.82)               | 9.02(7.19-11.1)    | 8.85(7.51-10.44)    | 8(6.48-9.92)        | -0.14(-0.21--0.06) * | -0.74(-0.78--0.7) *     |
| All ages                   | 7.22(5.96-8.57)                | 13.4(10.68-16.55)  | 12.79(11.93-13.72)  | 15.46(13.39-18.01)  | 2.09(2.02-2.16) *    | 1.34(1.27-1.4) *        |
| 15-49                      | 3.9(3.12-4.75)                 | 4.53(3.52-5.78)    | 4.57(3.86-5.41)     | 4.11(3.29-5.16)     | -0.08(-0.48-0.33)    | -0.006(-0.008--0.004) * |
| 50-69                      | 28.07(23.07-33.41)             | 26.27(20.74-32.83) | 25.12(21.42-29.670) | 22.71 (18.43-28.03) | -0.13(-0.31-0.04)    | -0.64(-0.74--0.54) *    |
| 70+                        | 36.77(31.66-42.91)             | 49.66(40.36-59.81) | 50.03(42.47-58.94)  | 50.45(40.83-62.05)  | 1.11(1.04-1.19) *    | 0.05(0-0.1)             |
| <b>Male</b> <sup>a</sup>   | 0.1(0.08-0.12)                 | 0.29(0.22-0.36)    | 0.29(0.23-0.36)     | 0.36(0.18-0.71)     | 6.03(5.08-6.97) *    | 1.55(1.45-1.65) *       |
| All ages                   | 0.06(0.05-0.07)                | 0.39(0.3-0.49)     | 0.39(0.32-0.47)     | 0.68(0.35-1.32)     | 8.98(7.93-10.03) *   | 3.9(3.77-4.03) *        |
| 15-49                      | 0.02(0.02-0.02)                | 0.08(0.06-0.1)     | 0.07(0.05-0.1)      | 0.05(0.02-0.11)     | 7.27(6.16-8.38) *    | -1.86(-2.14--1.58) *    |
| 50-69                      | 0.25(0.2-0.32)                 | 0.88(0.65-1.14)    | 0.95(0.75-1.21)     | 1.33(0.67-2.63)     | 7.02(5.89-8.15) *    | 2.65(2.47-2.84) *       |
| 70+                        | 0.64(0.52-0.76)                | 1.8(1.43-2.220)    | 1.87(1.45-2.4)      | 2.54(1.27-5)        | 5.33(4.59-6.08) *    | 1.9(1.68-2.11) *        |
| <b>Japan</b>               |                                |                    |                     |                     |                      |                         |
| <b>Both</b> <sup>a</sup>   | 4.82(4.59-4.95)                | 5.37(4.85-5.72)    | 5.41(4.97-5.88)     | 5.01(4.32-5.81)     | 0.55(0.41-0.7) *     | -0.54(-0.56--0.52) *    |
| <b>Female</b> <sup>a</sup> | 8.8(8.42-9.03)                 | 10.14(9.24-10.78)  | 10.2(9.4-11.08)     | 9.35(8.07-10.85)    | 0.66(0.5-0.81) *     | -0.62(-0.64--0.6) *     |
| All ages                   | 12.33(11.79-12.65)             | 24.29(20.41-26.39) | 24.64(23.53-25.72)  | 29.06(25.7-32.96)   | 2.53(2.39-2.68) *    | 1.21(1.15-1.26) *       |
| 15-49                      | 6.02(5.88-6.16)                | 5.99(5.73-6.34)    | 5.74(4.96-6.58)     | 4.67(3.69-5.78)     | -0.24(-0.38--0.1) *  | -1.5(-1.69--1.31) *     |
| 50-69                      | 25.28(24.51-25.91)             | 32.75(30.92-34.55) | 32.59(29.57-35.88)  | 26.66(22.88-30.99)  | 1.14(0.93-1.36) *    | -1.41(-1.49--1.34) *    |
| 70+                        | 37.52(33.46-39.42)             | 56.27(42.17-63.79) | 57.71(52.75-63.06)  | 70.79(61.31-81.92)  | 1.87(1.68-2.05) *    | 1.5(1.46-1.57) *        |
| <b>Male</b> <sup>a</sup>   | 0.09(0.08-0.09)                | 0.08(0.07-0.09)    | 0.07(0.06-0.09)     | 0.07(0.05-0.1)      | -0.7(-0.96--0.44) *  | -0.25(-0.27--0.24) *    |
| All ages                   | 0.1(0.09-0.1)                  | 0.2(0.18-0.22)     | 0.19(0.15-0.24)     | 0.24(0.18-0.33)     | 2.22(1.93-2.51) *    | 1.56(1.5-1.62) *        |
| 15-49                      | 0.02(0.02-0.02)                | 0.02(0.02-0.02)    | 0.01(0.01-0.02)     | 0.005(0-0.02)       | 0                    | -4(-6.78--1.22) *       |
| 50-69                      | 0.18(0.17-0.19)                | 0.18(0.17-0.2)     | 0.17(0.06-0.32)     | 0.17(0.06-0.32)     | -0.28(-0.56--0.01) * | -0.1(-0.54--0.35) *     |

|                            |                    |                    |                    |                    |                      |                      |
|----------------------------|--------------------|--------------------|--------------------|--------------------|----------------------|----------------------|
| 70+                        | 0.77(0.72-0.81)    | 0.8(0.68-0.88)     | 0.77(0.44-1.15)    | 0.85(0.47-1.31)    | -0.19(-0.4-0.02)     | 0.77(0.65-0.89) *    |
| <b>South<br/>Korea</b>     |                    |                    |                    |                    |                      |                      |
| <b>Both</b> <sup>a</sup>   | 4.32(4.09-4.58)    | 4.69(4.12-5.24)    | 4.67(4.23-5.17)    | 4.32(3.65-5.08)    | 0.46(0.31-0.6) *     | -0.57(-0.6--0.53) *  |
| <b>Female</b> <sup>a</sup> | 7.62(7.21-8.08)    | 8.73(7.71-9.73)    | 8.66(7.82-9.6)     | 7.97(6.72-9.4)     | 0.64(0.52-0.76) *    | -0.61(-0.65--0.57) * |
| All ages                   | 6.43(6.09-6.81)    | 15.38(13.56-17.22) | 15.92(15.05-16.88) | 20.34(17.78-23.21) | 3.24(3.13-3.36) *    | 1.75(1.66-1.83) *    |
| 15-49                      | 3.8(3.56-4.09)     | 5.03(4.29-5.81)    | 4.86(3.94-5.92)    | 4.14(3.01-5.46)    | 1.23(0.98-1.49) *    | -1.21(-1.31--1.1) *  |
| 50-69                      | 22.52(20.89-24.46) | 25.07(21.61-28.62) | 24.63(21.48-28.08) | 23.12(19.15-27.72) | 0.43(0.34-0.53) *    | -0.45(-0.57--0.33) * |
| 70+                        | 29.08(26.43-32.15) | 49.33(40.36-57.24) | 51.23(44.43-58.59) | 51.38(43.12-60.8)  | 2.03(1.85-2.21) *    | -0.06(-0.15-0.03)    |
| <b>Male</b> <sup>a</sup>   | 0.09(0.08-0.11)    | 0.08(0.06-0.1)     | 0.06(0.04-0.09)    | 0.05(0.03-0.09)    | -1.89(-2.53--1.26) * | -0.29(-0.31--0.27) * |
| All ages                   | 0.04(0.04-0.05)    | 0.1(0.08-0.13)     | 0.09(0.05-0.13)    | 0.14(0.08-0.22)    | 1.98(1.51-2.44) *    | 3.84(3.57-4.12) *    |
| 15-49                      | 0.02(0.01-0.02)    | 0.02(0.01-0.02)    | NA                 | NA                 | 0                    | NA                   |
| 50-69                      | 0.16(0.12-0.21)    | 0.14(0.09-0.21)    | 0.12(0-0.32)       | 0.14(0.01-0.34)    | -1.61(-2.16--1.06) * | 0.66(0.21-1.1) *     |
| 70+                        | 0.65(0.48-0.87)    | 0.68(0.47-0.97)    | 0.5(0-1.36)        | 0.53(0.11-1.20)    | -1.39(-2.08--0.7) *  | 0.11(-0.22-0.44) *   |

EAPC: estimated annual percentage change; <sup>a</sup>, Age-standardized death rate; \* Changes that are statistically significant.

Figure S1

World East Asia & Pacific China Japan South Korea

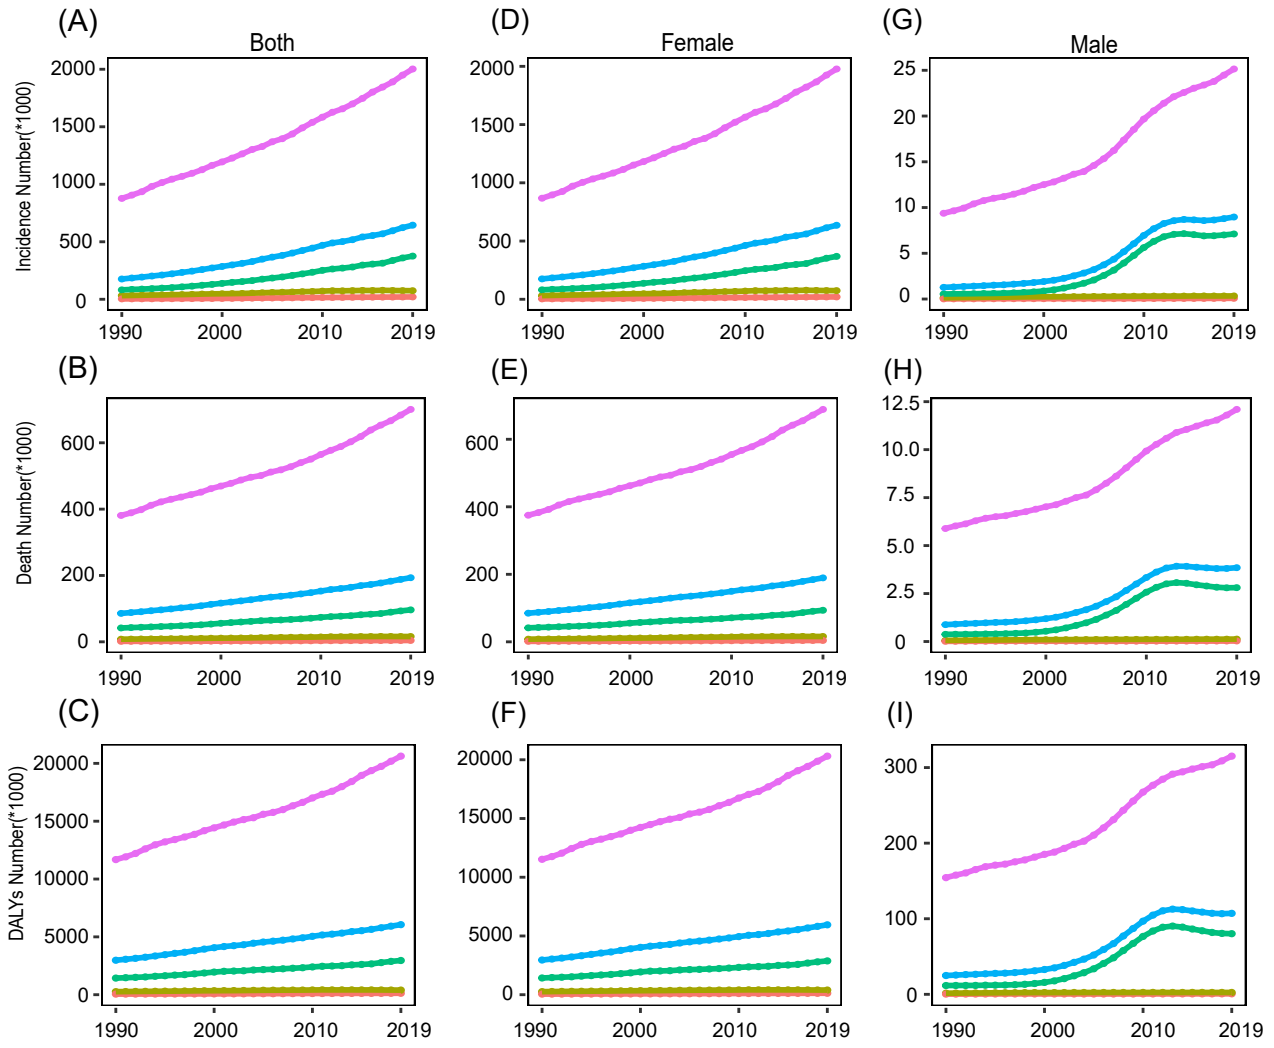

Figure S2

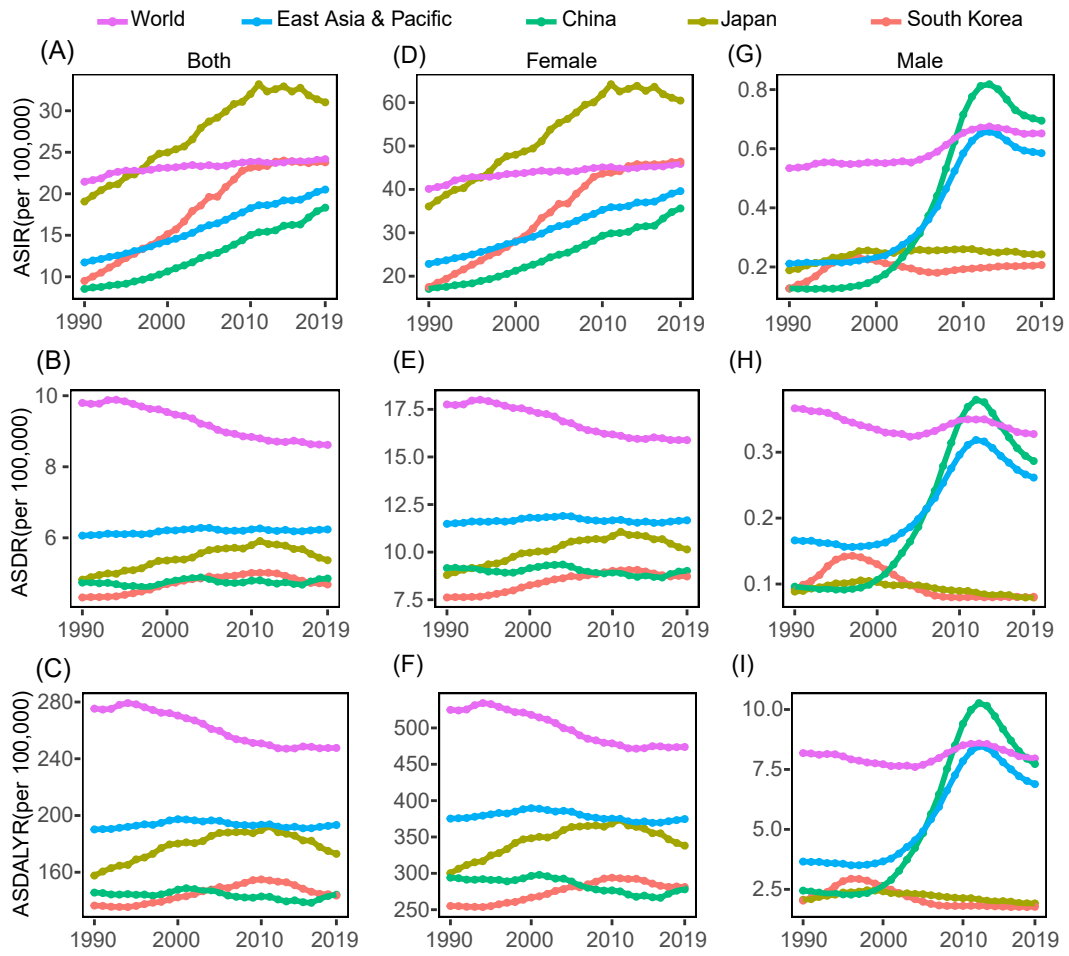

Figure S3

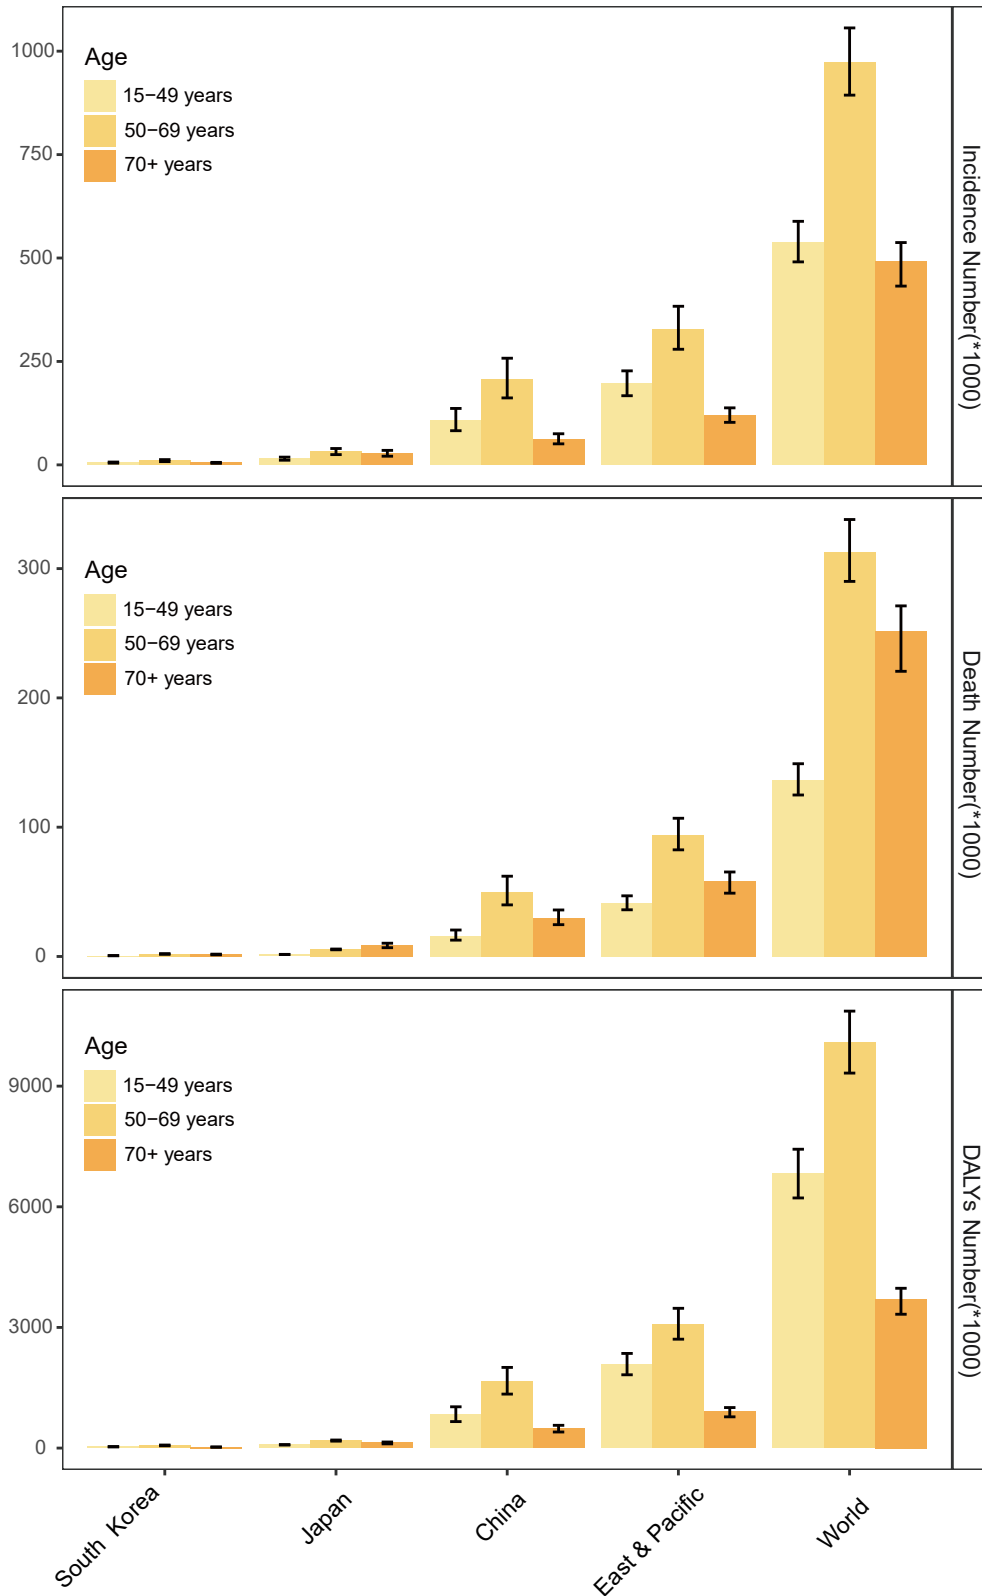

Figure S4

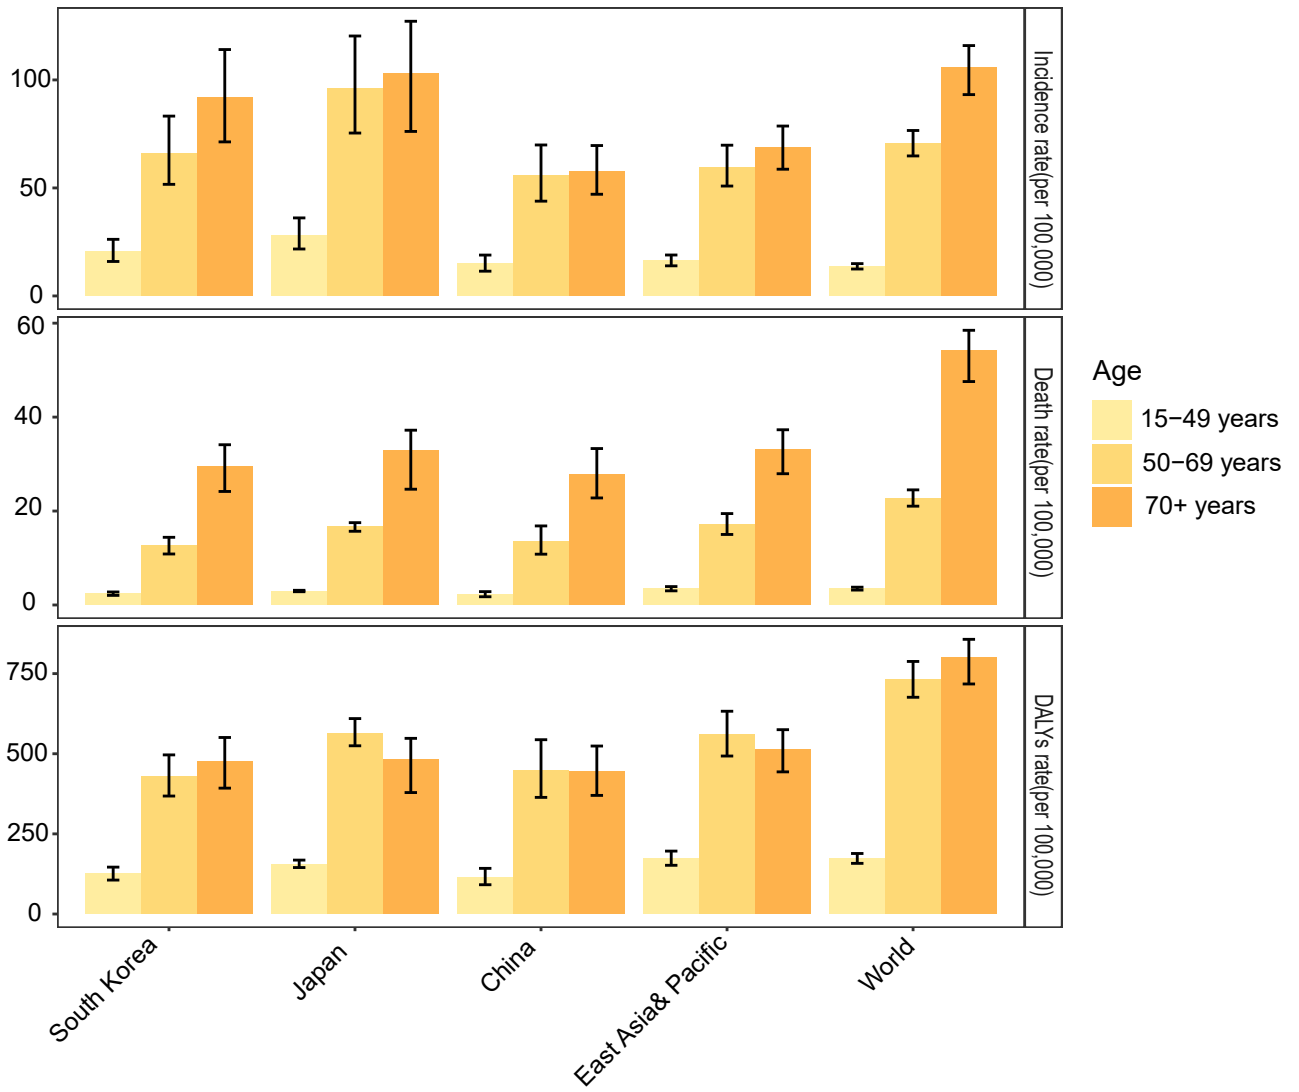



Figure S5

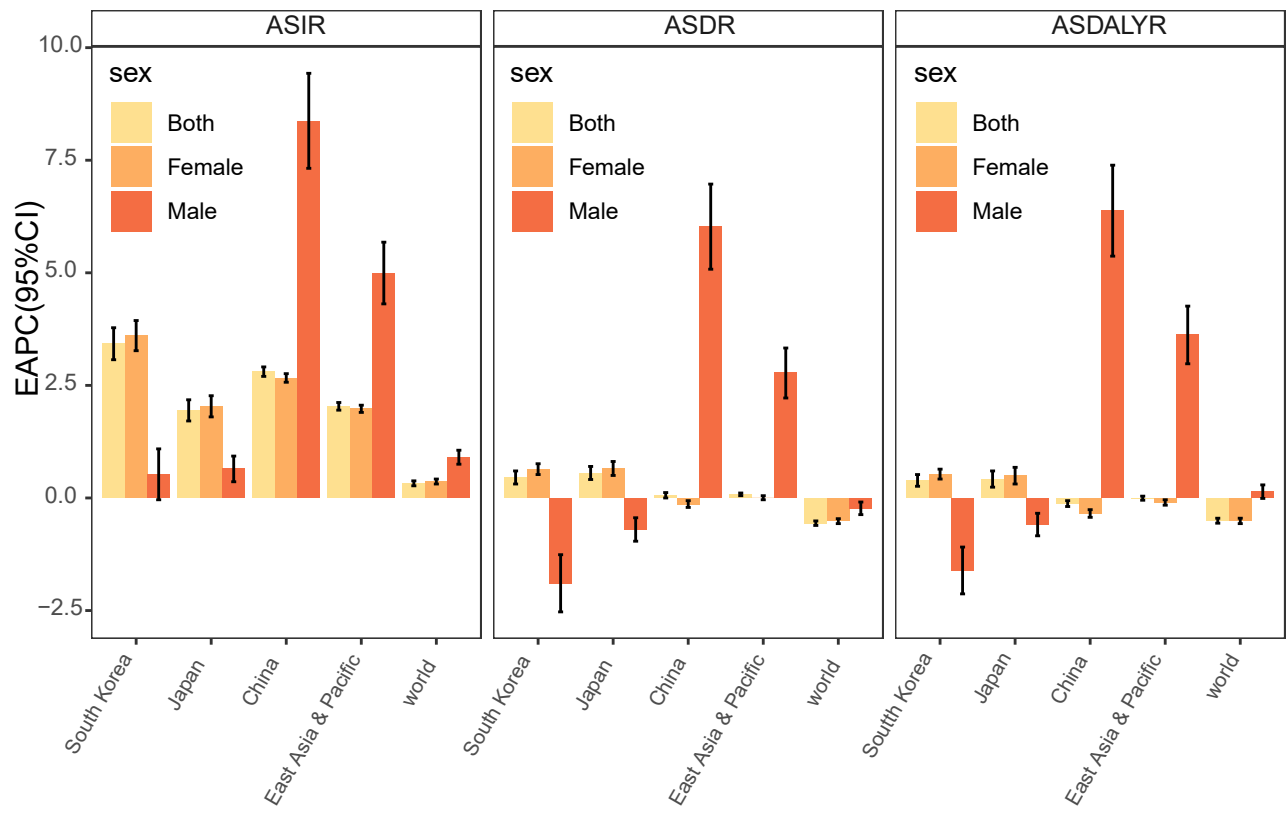

Figure S6

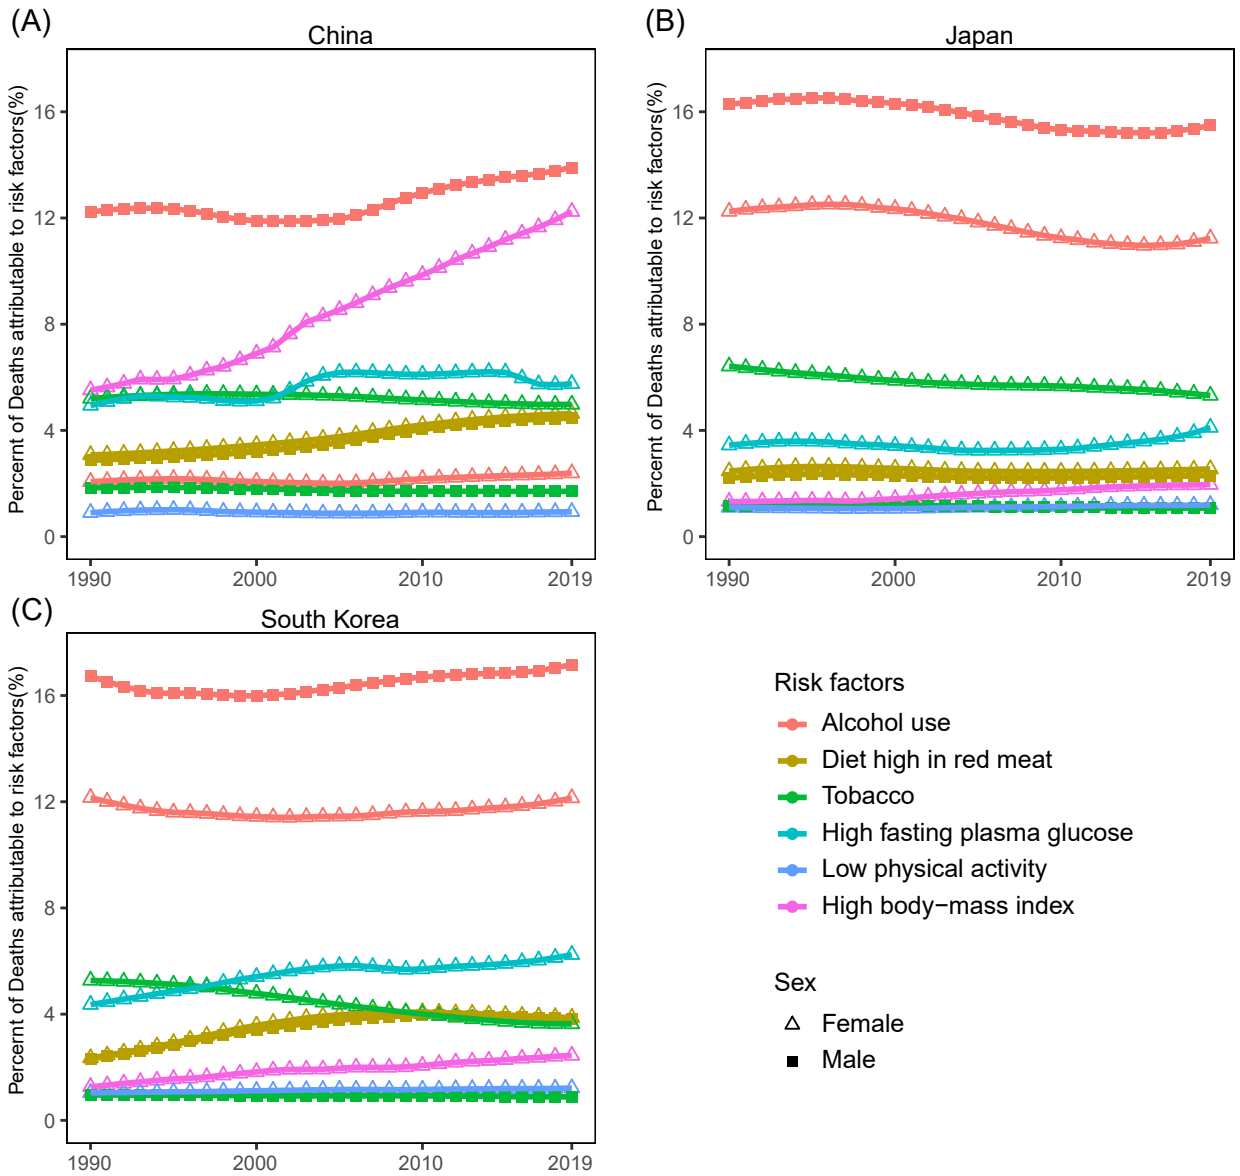

Figure S7

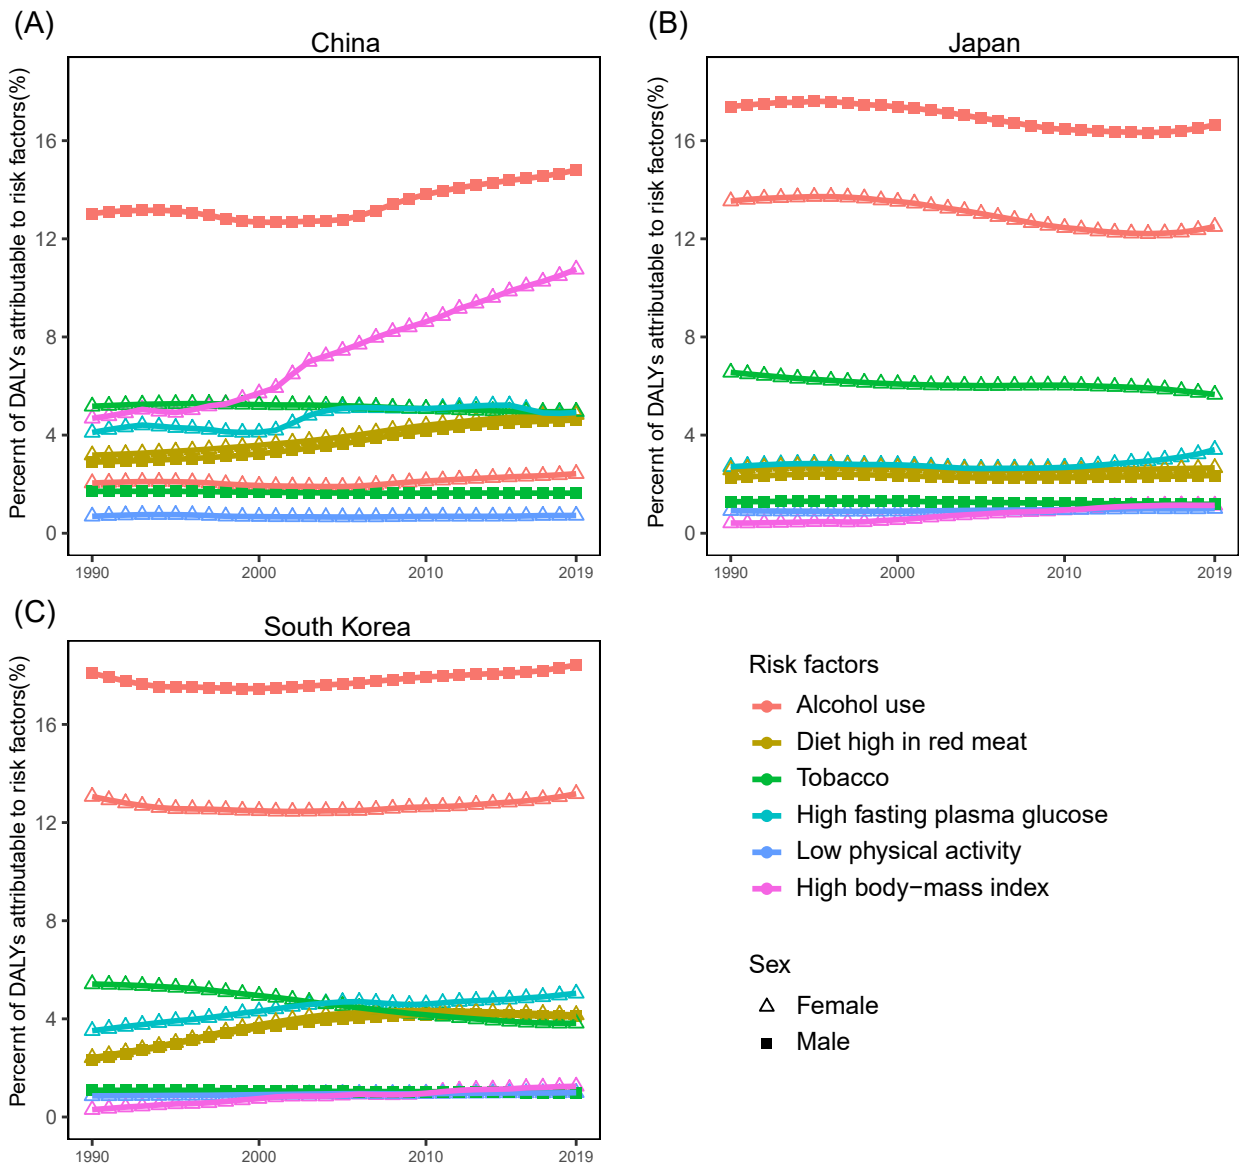

Figure S8

— Both observed value      — Female observed value      — Male observed value  
••• Both estimated and predicted value      ••• Female estimated and predicted value      ••• Male estimated and predicted value

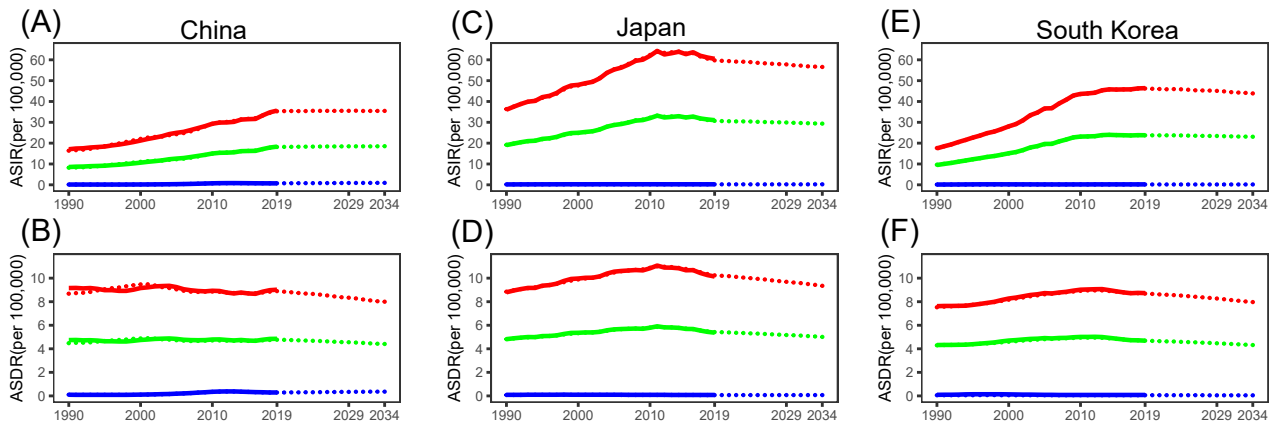

Figure S9

■ Observed      ■ Predicted

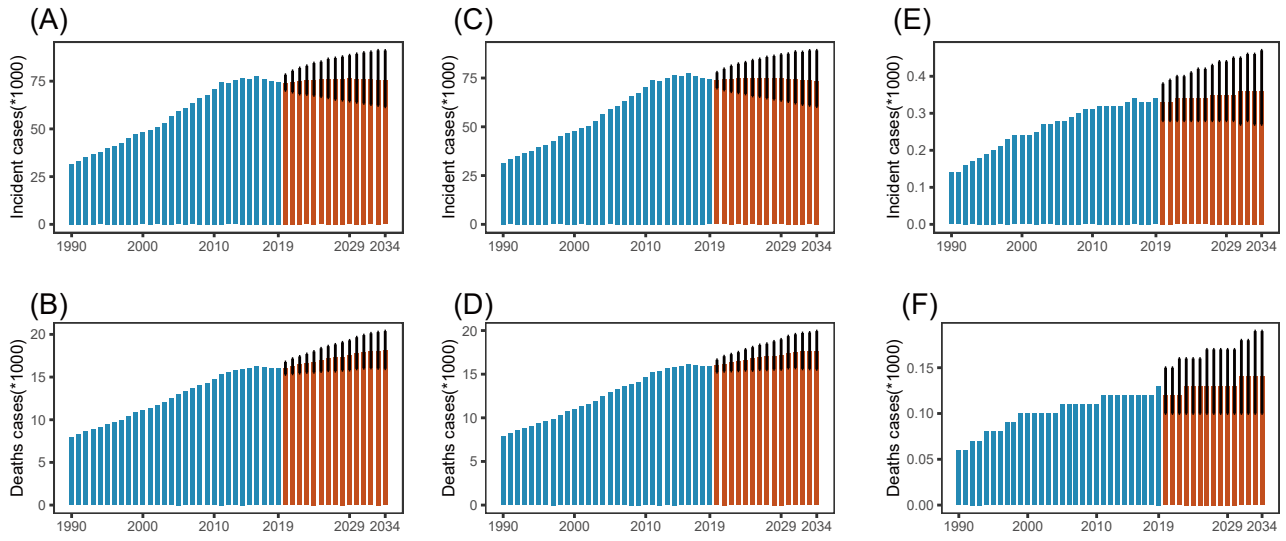

Figure S10

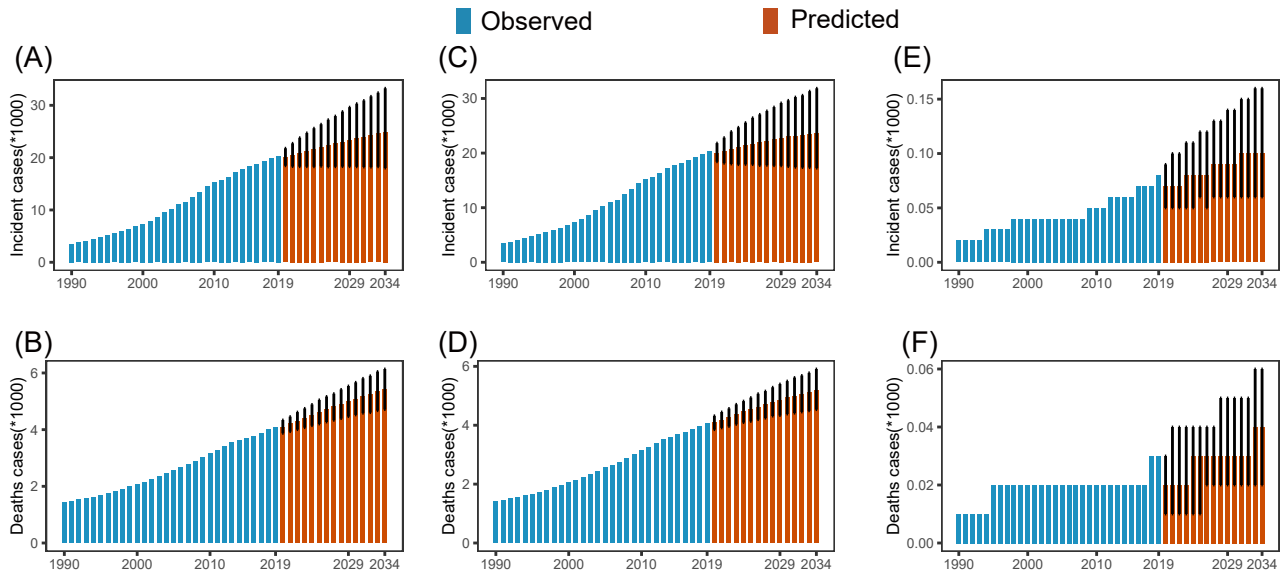

Supplement: 12885_2022_9923_MOESM1_ESM.pdf [file 12885_2022_9923_MOESM1_ESM.pdf]
